# Supplementary material
Source: PubMed Central journal article supplement (PMC6534092)
Supplement: Supp_Fig1.pdf [file Supp_Fig1.pdf]

## Supplementary Data

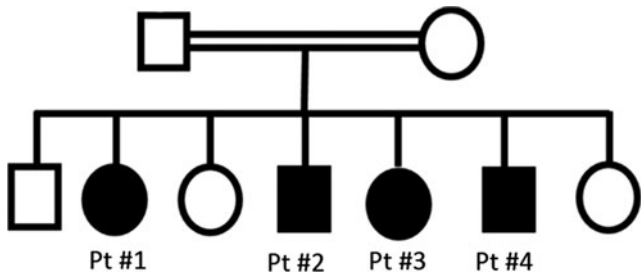

**Supplementary Figure S1.** Pedigree of patients affected with homozygous c.498\_499 mutation. Seven siblings born to a consanguineous relationship of whom four siblings were affected.

---
